# Supplementary material
Source: publisher figshare collection journal article supplement (https://karger.figshare.com/ndownloader/files/5961573)
Supplement: Supplementary file 1 [file 5961573]

Table S1: Two mediator analysis, TAS-20/PDS symptom Re-Experiencing = mediator, childhood abuse (dich.) = exposure, DES = dependent variable, sex, age, GSI = covariables, N=666.

Childhood abuse

| Effect of TAS-20 accounted for PDS (Re-Experiencing) | Mean | CI |
| --- | --- | --- |
| ACME | 0.086 | (-0.15, 0.36) |
| Direct Effect | 2.175 | (0.67, 3.71)* |
| Total Effect | 2.261 | (0.69, 3.83)* |
| % of TME | 0.038 | (0.02, 0.12) |

Childhood abuse

| Effect of PDS (Re-Experiencing) accounted for TAS-20 | Mean | CI |
| --- | --- | --- |
| ACME | 0.271 | (0.02, 0.61)* |
| Direct Effect | 2.175 | (0.67, 3.71)* |
| Total Effect | 2.446 | (0.88, 4.04)* |
| % of TME | 0.111 | (0.07, 0.30) |

TE: Total Effect; TME: Total Mediated Effect; ACME: Average Causal Mediated Effect; CI: 95% Confidence interval, * p<0.05
